# Supplementary material for: Tuning the circularly polarized luminescence of polymer-stabilized cholesteric liquid crystal films using chiral dopants
Source: Royal Society of Chemistry journal article supplement (doi:10.1039/d2tc00326k), 2022-01-01
Supplement: d2tc00326k1.pdf [file d2tc00326k1.pdf]

# Electronic Supplementary Material (ESI) for

## Tuning circularly polarized luminescence of polymer-stabilized cholesteric liquid crystal films using chiral dopants

Xiaohui Lu, Ziqing Zhou, Baining Ni, Hongkun Li, Yi Li, Baozong Li, Wei Liu\*, Yong Wang\* and Yonggang Yang\*

State and Local Joint Engineering Laboratory for Novel Functional Polymeric Materials, Jiangsu Key Laboratory of Advanced Functional Polymer Design and Application, Jiangsu Engineering Laboratory of Novel Functional Polymeric Materials, Department of Polymer Science and Engineering, College of Chemistry, Chemical Engineering and Materials Science, Key Laboratory of Polymeric Materials Design and Synthesis for Biomedical Function, Soochow University, Suzhou 215123, China. E-mail: weiliu@suda.edu.cn, yowang@suda.edu.cn, ygyang@suda.edu.cn.

### Table of contents

|                                                                                                                                    |        |
|------------------------------------------------------------------------------------------------------------------------------------|--------|
| Experimental Section                                                                                                               | S2-S5  |
| References                                                                                                                         | S5     |
| Table S1 Crystal measurement and refinement data for <b>TPE-BF<sub>2</sub>acac-MeIP</b>                                            | S6     |
| Table S2 Geometrical parameters for C–H...F contacts in the crystal of <b>TPE-BF<sub>2</sub>acac-MeIP</b>                          | S7     |
| Table S3 Optical data of <b>TPE-acac-MeIP</b> and <b>TPE-BF<sub>2</sub>acac-MeIP</b> in different solvents                         | S7     |
| Table S4 Calculated optical transitions of <b>TPE-acac-MeIP</b> and <b>TPE-BF<sub>2</sub>acac-MeIP</b>                             | S7     |
| Table S5 Optical data of <b>TPE-acac-MeIP</b> and <b>TPE-BF<sub>2</sub>acac-MeIP</b> in solid-state                                | S8     |
| Table S6 Mass percentages of compounds in the prepolymerized mixtures                                                              | S8     |
| Table S7 Bragg reflection properties of <i>R/S</i> CLC films                                                                       | S8     |
| Table S8 Quantum yields ( $\Phi_F$ ) of <i>R/S</i> CLC films                                                                       | S8     |
| Table S9 Compounds mass percentages in prepolymerized mixtures with different wt% of dye                                           | S9     |
| Fig. S1 Crystal packing of <b>TPE-BF<sub>2</sub>acac-MeIP</b>                                                                      | S9     |
| Fig. S2 Optical spectra of <b>TPE-acac-MeIP</b> and <b>TPE-BF<sub>2</sub>acac-MeIP</b> in different solvents                       | S10    |
| Fig. S3 Energy level diagram of frontier molecular orbitals and orbital distributions                                              | S10    |
| Fig. S4 Emission spectra of <b>TPE-acac-MeIP</b> in solid states                                                                   | S11    |
| Fig. S5 PXRD of <b>TPE-BF<sub>2</sub>acac-MeIP</b>                                                                                 | S11    |
| Fig. S6 Emission spectra of <i>R</i> -CLC films and <i>S</i> -CLC films                                                            | S12    |
| Fig. S7 Photographs and DRUV-vis spectra of <i>S</i> -CLC films with different structural colours                                  | S12    |
| Fig. S8 POM images                                                                                                                 | S13    |
| Fig. S9 FESEM images the <i>R</i> -CLC films with 2.00, 1.75, 1.50, and 1.30 wt% <i>R</i> 5011                                     | S13    |
| Fig. S10 CD of <b>TPE-BF<sub>2</sub>acac-MeIP</b> in ( <i>R</i> )/( <i>S</i> )-phenylethanol and DRCD of <i>R/S</i> -Red CLC films | S13    |
| Fig. S11 DRUV-vis and transmittance spectra of <i>R</i> -Dark Green CLC films                                                      | S14    |
| Fig. S12-19 ESI-MS, <sup>1</sup> H NMR, <sup>13</sup> C NMR, and FT-IR spectra                                                     | S15-18 |

## Experimental Section

### Materials and instruments

Tetrakis(triphenylphosphine)palladium, 2-aminopyridine, NaH, <sup>n</sup>Bu<sub>4</sub>NBr, and BF<sub>3</sub>•Et<sub>2</sub>O were purchased from Energy Chemical Co., Ltd. Acetylacetone and K<sub>2</sub>CO<sub>3</sub> were purchased from Sinopharm Group Co. Ltd. N-bromosuccinimide (NBS) was purchased from Shanghai Aladdin Biochemical Technology Co., Ltd. 2-Bromo-1,1,2-triphenylethylene was purchased from Shanghai Macklin Biochemical Co., Ltd. **C6M**, **RM105**, **R-5011** and **S-5011** were purchased from Sanjiang advanced materials R&D Co., Ltd. **BDK** was purchased from Adamas Chemical Co., Ltd. Methyl 4-boronobenzoate was purchased from Accela ChemBio Co., Ltd. Solvents were distilled with standard methods.

FT-IR spectra of solid samples were performed in the range of 400–4000 cm<sup>-1</sup> on a Bruker VRETEX 70 spectrometer at 4.0 cm<sup>-1</sup> resolution by an averaging over 16 scans. Mass spectra were recorded on Bruker micro TOF-Q III and Agilent Technologies 6220 Accurate-Mass TOF LC/MS. <sup>1</sup>H NMR and <sup>13</sup>C NMR were recorded with Agilent-400 and Bruker-400 spectrometers in CDCl<sub>3</sub> at ambient temperature. Chemical shifts (δ, ppm) were reported with respect to residual solvent peaks as internal standard (<sup>1</sup>H: chloroform, δ = 7.26 ppm; <sup>13</sup>C: chloroform, δ = 77.2 ppm). The UV–vis absorption spectra and DRUV-vis reflectance spectra were carried out on UV-VIS-NIR spectrophotometer (UV3600). Emission measurements were recorded with FLS920 fluorescence spectrometer at the solution and the solid-state. The absolute fluorescence quantum yields for samples and films were measured on FLS 980 (Edinburgh Instrument, UK). The POM images of the target compounds were taken using a Leica Microsystems CMS GmbH fitted with a Linkam LTS420 hot stage. Circular dichroism (CD) spectra for solutions were obtained on a JASCO J-1500 spectrometer (Tokyo, Japan), with a bandwidth of 2.0 nm, a 0.5 nm-interval, an average scanning speed of 200 nm/min, and a 2-mm cell at 25°C. Diffuse reflectance circular dichroism (DRCD) spectra were measured by using a JASCO 815 spectrometer (JASCO, Japan), and anhydrous barium sulfate dried at a high temperature was used as blank. CPL spectra were measured on JASCO CPL-300 (Tokyo, Japan), with an excitation wavelength of 400 nm, a scan speed of 200 nm/min, number of scans of 1, and slit width of 3000 μm at 25°C. To eliminate the effect of linearly polarized luminescence, CPL spectra of the films were measured by using a plate holder allowing the samples to be rotated through 360° at 22.5° increments. 1-(2-methylimidazo[1,2-*a*]pyridin-3-yl)ethan-1-one (**MeIP-COMe**) and methyl 4-(1,2,2-triphenylvinyl)benzoate (**TPE-COOMe**) were prepared according to the previously reported method.<sup>S1, S2</sup>

### Computation details

All calculations were carried out with Gaussian 09 programs.<sup>S3</sup> The optimizations were started from the geometries of **TPE-acac-MeIP** and **TPE-BF<sub>2</sub>acac-MeIP** obtained by X-ray diffraction. Density functional theory (DFT) and time-dependent DFT (TDDFT) were carried out at the B3LYP functional level by using 6-31G(d) for all atoms.<sup>S4-6</sup>

### X-ray crystallography

Orange-red single crystals of **TPE-BF<sub>2</sub>acac-MeIP** grown from concentrated CH<sub>3</sub>CN/EtOAc (v/v, 1/1) solutions at room temperature were selected and mounted on a glass fiber. Crystal determination was performed with a Bruker SMART APEX II CCD diffractometer equipped with graphite-monochromated Mo K $\alpha$  radiation ( $\lambda = 0.71073$  Å). The structures were solved by direct methods and refined by full-matrix least squares methods on  $F^2$  using SHELX<sup>S7</sup> under OLEX2.<sup>S8</sup> The hydrogen atoms were assigned with common isotropic displacement factors, and included in the final refinement by use of geometrical restraints. CCDC 210127 contains the supplementary crystallographic data for this paper. These data can be obtained free of charge from the Cambridge Crystallographic Data Centre via [www.ccdc.cam.ac.uk/data\\_request/cif](http://www.ccdc.cam.ac.uk/data_request/cif).

### Preparation for AIE study

A stock solution of sample **TPE-BF<sub>2</sub>acac-MeIP** (1 mM) was prepared in THF, and 20  $\mu$ L of this stock solution was transferred to a 10 mL volumetric flask. After adding proper amounts of THF, deionized water was then added slowly under sonication to afford 10  $\mu$ M solutions with different water volume fractions. The emission spectra of the prepared solutions were measured immediately.

### Preparation for liquid crystal thin films

Reactive CLC mesogens **C6M** and **RM105**, photoinitiator **BDK**, chiral dopants **R/S5011**, and dye **TPE-BF<sub>2</sub>acac-MeIP** were dissolved in dichloromethane according to the weight ratios listed in Table S6. The solvent was then evaporated completely on the surface of a quartz plate at 120°C for 5 min. The thickness of the liquid layer was kept at 11  $\mu$ m, by using an 11  $\mu$ m spacer in the middle between two quartz plates. After the temperature of the liquid layer was cooled down to 90°C, a 365 nm-xenon lamp irradiation was carried out (10 seconds) for photopolymerization. Then free-standing R/S-CLC films were obtained and peeled off from the quartz plates with a blade.

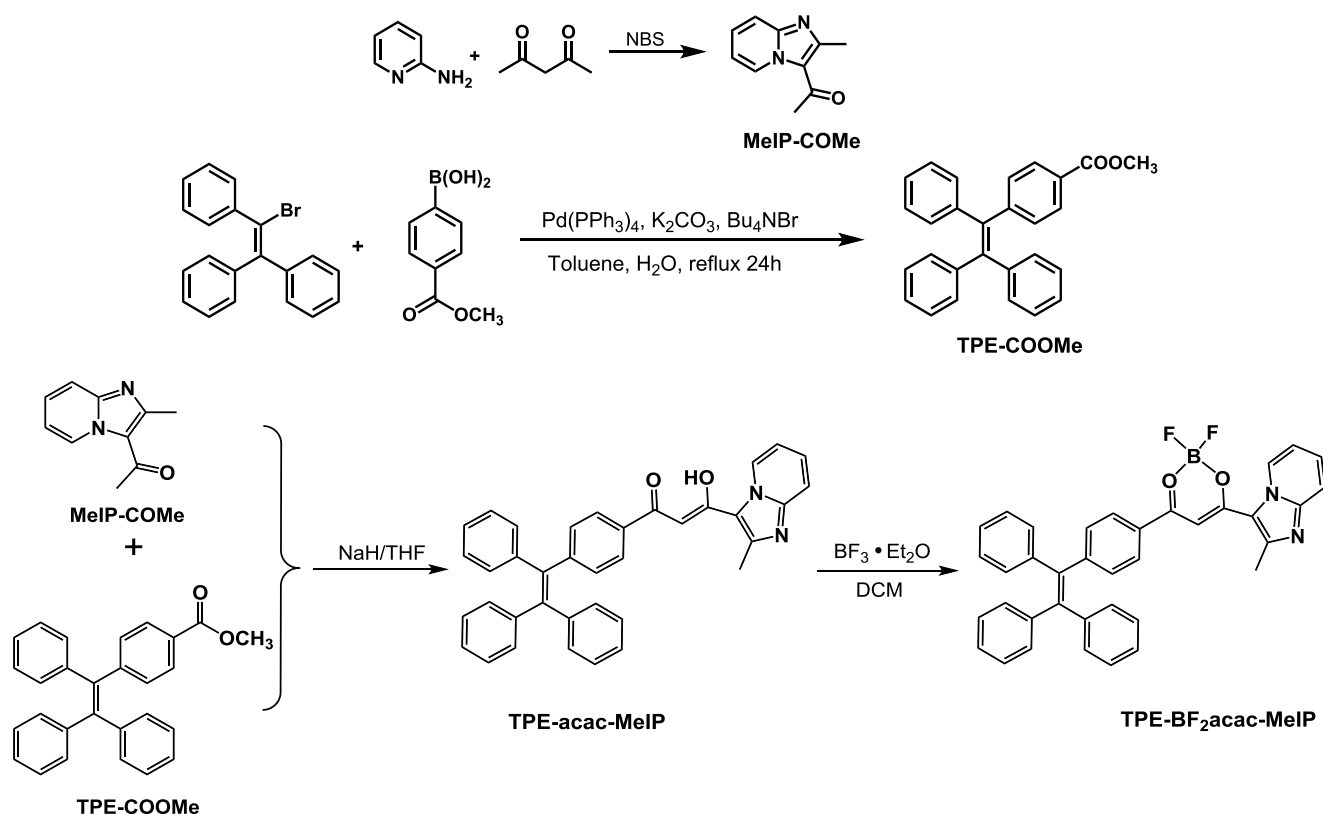

Scheme S1. Synthetic routes of compounds **TPE-acac-MeIP** and **TPE-BF<sub>2</sub>acac-MeIP**.

#### Synthesis of compound **TPE-acac-MeIP**.

Under a N<sub>2</sub> atmosphere, to a THF solution (40 mL) of 1-(2-methylimidazo[1,2-*a*]pyridin-3-yl)ethan-1-one (**MeIP-COMe**, 0.45 g, 2.60 mmol) in a three-necked flask, NaH (0.60 g, 10.2 mmol) was added. The mixture was refluxed with stirring for 2 h, and the mixture changed from colorless to dark-red. Methyl 4-(1,2,2-triphenylvinyl)benzoate (**TPE-COOMe**, 1.30 g, 3.30 mmol) was added, and the reaction was continued for 24 h. After the reaction was complete which was confirmed by TLC, the mixture was cooled to room temperature, and poured into ice water and acidified with HCl (2 M) to pH  $\approx$  5-6. After extraction with dichloromethane (3  $\times$  40 mL), the organic phase was dried over anhydrous Na<sub>2</sub>SO<sub>4</sub>. The solvent was evaporated, and the residue was purified by column chromatography (silica gel, EtOAc/petroleum ether, v/v = 1:1) to give a yellow powder of **TPE-acac-MeIP**. Yield: 45% (0.60 g). m. p. 164.2–165.2°C. FT-IR (ATR, cm<sup>-1</sup>): 1603, 1443, 787, 659. <sup>1</sup>H NMR (400 MHz, CDCl<sub>3</sub>):  $\delta$  16.59 (s, 1H), 9.66 (d, *J* = 7.2 Hz, 1H), 7.66 (s, 3H), 7.41 (s, 1H), 7.12 (s, 10H), 7.04 (s, 8H), 6.58 (s, 1H), 2.82 (s, 3H). <sup>13</sup>C NMR (101 MHz, CDCl<sub>3</sub>):  $\delta$  182.6, 177.1, 150.9, 148.0, 147.0, 143.3, 143.2, 143.2, 142.4, 132.1, 131.7, 131.3, 129.3, 128.5, 127.9, 127.8, 127.7, 126.9, 126.7, 125.9, 120.0, 116.7, 114.1, 95.1, 18.3. ESI-MS (*m/z*): 533.2218, Calcd. exact mass for C<sub>37</sub>H<sub>29</sub>N<sub>2</sub>O<sub>2</sub><sup>+</sup> ([M+H]<sup>+</sup>): 533.2224. Calcd. for C<sub>37</sub>H<sub>28</sub>N<sub>2</sub>O<sub>2</sub>: C, 83.43, H, 5.30, N, 5.26. Found: C, 82.46, H, 5.46, N, 5.26.

## Synthesis of compound **TPE-BF<sub>2</sub>acac-MeIP**.

Under N<sub>2</sub>, BF<sub>3</sub>•Et<sub>2</sub>O (0.35 mL, 2.75 mmol) was added dropwise to a solution of **TPE-acac-MeIP** (0.30 g, 0.55 mmol) in anhydrous CH<sub>2</sub>Cl<sub>2</sub> (30 mL). The mixture was stirred at 50°C for 5 h. After quenching the reaction with water, the mixture was extracted with dichloromethane, and dried over anhydrous Na<sub>2</sub>SO<sub>4</sub>. The solvent was evaporated, and the crude product was recrystallized in EtOAc to afford an orange powder. Yield: 91% (0.33 g). m. p. > 260°C FT-IR (ATR, cm<sup>-1</sup>): 1556, 1273, 701. <sup>1</sup>H NMR (400 MHz, CDCl<sub>3</sub>): δ 9.52 (d, *J* = 7.0 Hz, 1H), 7.81 (d, *J* = 8.3 Hz, 2H), 7.73 (d, *J* = 8.7 Hz, 1H), 7.61 (t, *J* = 7.9 Hz, 1H), 7.20 (s, 1H), 7.18–7.11 (m, 12H), 7.07–7.01 (m, 6H), 6.84 (s, 1H), 2.87 (s, 3H). <sup>13</sup>C NMR (100 MHz, CDCl<sub>3</sub>): δ 182.6, 177.1, 150.9, 148.0, 147.0, 143.3, 143.2, 142.4, 132.1, 131.7, 131.3, 129.3, 128.5, 127.9, 127.8, 127.7, 126.9, 126.7, 125.9, 120.0, 116.7, 114.1, 95.1, 18.3. ESI-MS (*m/z*): 581.2143, Calcd. exact mass for C<sub>37</sub>H<sub>28</sub>BF<sub>2</sub>N<sub>2</sub>O<sub>2</sub><sup>+</sup> ([M+H]<sup>+</sup>): 581.2206. Calcd. for C<sub>37</sub>H<sub>28</sub>BF<sub>2</sub>N<sub>2</sub>O<sub>2</sub>: C, 76.56, H, 4.69, N, 4.83. Found: C, 76.01, H, 4.80, N, 4.80.

## References

- S1. S. B. Bhagat and V. N. Telvekar, *Tetrahedron Lett.*, 2017, **58**, 3662–3666.
- S2. H. Gao, D. Xu, X. Liu, A. Han, L. Zhou, C. Zhang, Z. Li and J. Dang, *Dyes Pigm.*, 2017, **139**, 157–165.
- S3. M. J. Frisch, G. W. Trucks, H. B. Schlegel, G. E. Scuseria, M. A. Robb, J. R. Cheeseman, G. Scalmani, V. Barone, B. Mennucci, G. A. Petersson, H. Nakatsuji, M. Caricato, X. Li, H. P. Hratchian, A. F. Izmaylov, J. Bloino, G. Zheng, J. L. Sonnenberg, M. Hada, M. Ehara, K. Toyota, R. Fukuda, J. Hasegawa, M. Ishida, T. Nakajima, Y. Honda, O. Kitao, H. Nakai, T. Vreven, J. A. J. Montgomery, J. E. Peralta, F. Ogliaro, M. Bearpark, J. J. Heyd, E. Brothers, K. N. Kudin, V. N. Staroverov, R. Kobayashi, J. Normand, K. Raghavachari, A. Rendell, J. C. Burant, S. S. Iyengar, J. Tomasi, M. Cossi, N. Rega, J. M. Millam, M. Klene, J. E. Knox, J. B. Cross, V. Bakken, C. Adamo, J. Jaramillo, R. Gomperts, R. E. Stratmann, O. Yazyev, A. J. Austin, R. Cammi, C. Pomelli, J. W. Ochterski, R. L. Martin, K. Morokuma, V. G. Zakrzewski, G. A. Voth, P. Salvador, J. J. Dannenberg, S. Dapprich, A. D. Daniels, O. Farkas, J. B. Foresman, J. V. Ortiz, J. Cioslowski and D. J. Fox, *Gaussian 09, revision D.01 Gaussian, Inc.: Wallingford, CT*, 2013.
- S4. C. Lee, W. Yang and R. G. Parr, *Phys. Rev. B*, 1988, **37**, 785–789.
- S5. B. Miehlich, A. Savin, H. Stoll and H. Preuss, *Chem. Phys. Lett.*, 1989, **157**, 200–206.
- S6. A. D. Becke, *J. Chem. Phys.*, 1993, **132**, 5648–5652.
- S7. G. M. Sheldrick, *Acta Crystallogr A*, 2008, **64**, 112–122.
- S8. O. V. Dolomanov, L. J. Bourhis, R. J. Gildea, J. A. K. Howard and H. Puschmann, *J. Appl. Crystallogr.*, 2009, **42**, 339–341.

**Table S1** Crystal measurement and refinement data for **TPE-BF<sub>2</sub>acac-MeIP**.

|                                                              |                                                                               |
|--------------------------------------------------------------|-------------------------------------------------------------------------------|
| CCDC Number                                                  | 2101277                                                                       |
| Empirical formula                                            | C <sub>37</sub> H <sub>27</sub> BF <sub>2</sub> N <sub>2</sub> O <sub>2</sub> |
| Formula weight                                               | 580.46                                                                        |
| Temperature/K                                                | 296.15                                                                        |
| Crystal system                                               | monoclinic                                                                    |
| Space group                                                  | <i>C2/c</i>                                                                   |
| <i>a</i> /Å                                                  | 35.867(3)                                                                     |
| <i>b</i> /Å                                                  | 8.0882(5)                                                                     |
| <i>c</i> /Å                                                  | 19.9608(15)                                                                   |
| $\alpha$ /°                                                  | 90                                                                            |
| $\beta$ /°                                                   | 100.844(2)                                                                    |
| $\gamma$ /°                                                  | 90                                                                            |
| Volume/Å <sup>3</sup>                                        | 5687.2(7)                                                                     |
| <i>Z</i>                                                     | 8                                                                             |
| $\rho_{\text{calc}}$ g/cm <sup>3</sup>                       | 1.3557                                                                        |
| $\mu$ /mm <sup>-1</sup>                                      | 0.092                                                                         |
| <i>F</i> (000)                                               | 2417.2                                                                        |
| Crystal size/mm <sup>3</sup>                                 | 0.6 × 0.4 × 0.2                                                               |
| Radiation                                                    | Mo K $\alpha$ ( $\lambda$ = 0.71073)                                          |
| 2 $\theta$ range for data collection/°                       | 4.36 to 50                                                                    |
| Index ranges                                                 | −38 ≤ <i>h</i> ≤ 46, −10 ≤ <i>k</i> ≤ 10, −25 ≤ <i>l</i> ≤ 22                 |
| Reflections collected                                        | 32288                                                                         |
| Independent reflections                                      | 5015 [ <i>R</i> <sub>int</sub> = 0.0915, <i>R</i> <sub>sigma</sub> = 0.1019]  |
| Data/restraints/parameters                                   | 5015/1/398                                                                    |
| Goodness-of-fit on <i>F</i> <sup>2</sup>                     | 1.071                                                                         |
| Final <i>R</i> indexes [ <i>I</i> ≥ 2 $\sigma$ ( <i>I</i> )] | <i>R</i> <sub>1</sub> = 0.0536, <i>wR</i> <sub>2</sub> = 0.1210               |
| Final <i>R</i> indexes [all data]                            | <i>R</i> <sub>1</sub> = 0.1064, <i>wR</i> <sub>2</sub> = 0.1431               |
| Largest diff. peak/hole / e Å <sup>-3</sup>                  | 0.43/−0.54                                                                    |

**Table S2** Geometrical parameters for C–H...F contacts in the crystal of **TPE-BF<sub>2</sub>acac-MeIP**.

| Contacts     | H...F (Å) | C...F (Å) | C–H...F (deg) | Symmetry operation |
|--------------|-----------|-----------|---------------|--------------------|
| C3–H3...F1   | 2.769(5)  | 3.336(5)  | 120.3         | x, –1+y, z         |
| C5–H5...F2   | 2.849(0)  | 3.459(9)  | 124.3         | 1–x, y, 1.5–z      |
| C6–H6...F2   | 2.854(1)  | 3.584(9)  | 133.6         | 1–x, 1–y, 2–z      |
| C13–H13...F2 | 2.515(1)  | 3.173(7)  | 128.0         | 1–x, 1–y, 2–z      |

**Table S3** Optical data of **TPE-acac-MeIP** and **TPE-BF<sub>2</sub>acac-MeIP** measured in different solvents (ca. 20  $\mu$ M).

| Compound                           | Solvent                         | $\lambda_{abs}^{max} / \text{nm}^a$ | $\lg \epsilon^b$ | $\lambda_{em}^{max}(\lambda_{ex}) / \text{nm}$ | Stokes shift/ $\text{cm}^{-1}$ |
|------------------------------------|---------------------------------|-------------------------------------|------------------|------------------------------------------------|--------------------------------|
| <b>TPE-acac-MeIP</b>               | DMSO                            | 403                                 | 4.6              | 495 (400)                                      | 4610                           |
|                                    | CH <sub>3</sub> CN              | 396                                 | 4.6              | 487 (400)                                      | 4720                           |
|                                    | THF                             | 400                                 | 4.7              | 477 (400)                                      | 4040                           |
|                                    | CH <sub>2</sub> Cl <sub>2</sub> | 399                                 | 4.6              | 484 (400)                                      | 4400                           |
|                                    | Tol                             | 400                                 | 4.7              | 473 (400)                                      | 3860                           |
| <b>TPE-BF<sub>2</sub>acac-MeIP</b> | DMSO                            | 461                                 | 4.5              | 622 (455)                                      | 5610                           |
|                                    | CH <sub>3</sub> CN              | 453                                 | 4.4              | 619 (455)                                      | 5920                           |
|                                    | THF                             | 456                                 | 4.6              | 555 (455)                                      | 3910                           |
|                                    | CH <sub>2</sub> Cl <sub>2</sub> | 457                                 | 4.5              | 595 (455)                                      | 5080                           |
|                                    | Tol                             | 459                                 | 4.6              | 519 (455)                                      | 2520                           |

<sup>a</sup> All of the values correspond to the strongest absorption peaks. <sup>b</sup> Molar absorption coefficients are in the maximum of the highest peak.

**Table S4** Main calculated optical transitions for **TPE-acac-MeIP** and **TPE-BF<sub>2</sub>acac-MeIP** at the level of B3LYP/6-31G(d).

| Compound                           | Orbital excitation        | Composition | $f^a$  | $\lambda^b / \text{nm}$<br>(calcd.) | $\lambda^c / \text{nm}$<br>(exptl. in CH <sub>2</sub> Cl <sub>2</sub> ) |
|------------------------------------|---------------------------|-------------|--------|-------------------------------------|-------------------------------------------------------------------------|
| <b>TPE-acac-MeIP</b>               | HOMO $\rightarrow$ LUMO   | 0.70266     | 0.7416 | 408                                 | 400                                                                     |
|                                    | HOMO $\rightarrow$ LUMO   | 0.70404     | 0.5094 | 462                                 | 457                                                                     |
| <b>TPE-BF<sub>2</sub>acac-MeIP</b> | HOMO-1 $\rightarrow$ LUMO | 0.68987     | 0.7192 | 368                                 | 340 (sh)                                                                |
|                                    | HOMO $\rightarrow$ LUMO+1 | 0.65508     | 0.2321 | 331                                 |                                                                         |

<sup>a</sup> Oscillator strength; <sup>b</sup> Calculated peaks of UV–vis spectra; <sup>c</sup> Experimental data of UV–vis spectra in THF solution.

**Table S5** Optical data for **TPE-acac-MeIP** and **TPE-BF<sub>2</sub>acac-MeIP** measured in solid-state.

| Compound                                         | TPE-acac-MeIP | TPE-BF <sub>2</sub> acac-MeIP |
|--------------------------------------------------|---------------|-------------------------------|
| $\lambda_{\text{em}}^{\text{max}} / \text{nm}$   | 503           | 558                           |
| $\Phi_{\text{F}}^{\text{a}} \%$                  | 6.8           | 54.5                          |
| $\tau^{\text{b}} / \text{ns}$                    | 1.9           | 14.2                          |
| $k_{\text{r}}^{\text{c}} (10^9 \text{ s}^{-1})$  | 0.036         | 0.038                         |
| $k_{\text{nr}}^{\text{d}} (10^9 \text{ s}^{-1})$ | 0.49          | 0.032                         |

<sup>a</sup> Fluorescence quantum yields ( $\Phi$ ) are measured by the absolute method. <sup>b</sup> Emission lifetime collected at their respective emission maxima. <sup>c</sup> Radiative decay constants  $k_{\text{r}} = \Phi_{\text{F}}/\tau$ . <sup>d</sup> Non-radiative decay constants  $k_{\text{nr}} = (1-\Phi_{\text{F}})/\tau$ .

**Table S6** The mass percentages of compounds in the pre-polymerized mixtures.

| Color<br>Compound                  | Blue  | Dark Green | Green | Red   |
|------------------------------------|-------|------------|-------|-------|
| C6M                                | 75.00 | 75.25      | 75.50 | 75.70 |
| RM105                              | 20.00 | 20.00      | 20.00 | 20.00 |
| <b>TPE-BF<sub>2</sub>acac-MeIP</b> | 2.00  | 2.00       | 2.00  | 2.00  |
| BDK                                | 1.00  | 1.00       | 1.00  | 1.00  |
| R/S5011                            | 2.00  | 1.75       | 1.50  | 1.30  |

**Table S7** Bragg reflection properties of R/S CLC films.

| Films          | $\lambda$ (nm) <sup>a</sup> | n <sup>b</sup> | c <sup>c</sup> | p (nm) <sup>d</sup> | $\beta_{\text{m}}$ ( $\mu\text{m}^{-1}$ ) <sup>e</sup> |
|----------------|-----------------------------|----------------|----------------|---------------------|--------------------------------------------------------|
| R/S-Red        | 659/655                     | 1.48           | 1.30           | 445/443             | 173/174                                                |
| R/S-Green      | 555/556                     | 1.48           | 1.50           | 375/376             | 178/177                                                |
| R/S-Dark Green | 520/522                     | 1.48           | 1.75           | 351/353             | 163/162                                                |
| R/S-Blue       | 454/452                     | 1.48           | 2.00           | 307/305             | 163/164                                                |

<sup>a</sup>  $\lambda_{\text{max}}$  values of the CLC films. <sup>b</sup> refractive indices of the CLC films. <sup>c</sup> The mass ratio of the chiral dopants in the CLC films. <sup>d</sup> Helical pitches of the CLC films. <sup>e</sup> The calculated HTP values of R/S5011 ( $\beta_{\text{m}} = \text{p}^{-1}\text{c}^{-1}$ ).

**Table S8** Quantum yields ( $\Phi_{\text{F}}$ ) of R/S CLC films.

| Color<br>$\Phi_{\text{F}}\%$ | Blue | Dark Green | Green | Red  |
|------------------------------|------|------------|-------|------|
| R-CLC                        | 63.9 | 58.7       | 61.5  | 50.6 |
| S-CLC                        | 58.2 | 60.9       | 64.2  | 52.8 |

**Table S9** The mass percentages of compounds in the pre-polymerized mixtures for *R*-Dark Green CLC films with different amounts of **TPE-BF<sub>2</sub>acac-MeIP**.

| Compound                           | Color      |            |            |
|------------------------------------|------------|------------|------------|
|                                    | Dark Green | Dark Green | Dark Green |
| C6M                                | 75.25      | 76.25      | 76.75      |
| RM105                              | 20.00      | 20.00      | 20.00      |
| <b>TPE-BF<sub>2</sub>acac-MeIP</b> | 2.00       | 1.00       | 0.50       |
| BDK                                | 1.00       | 1.00       | 1.00       |
| <i>R</i> 5011                      | 1.75       | 1.75       | 1.75       |

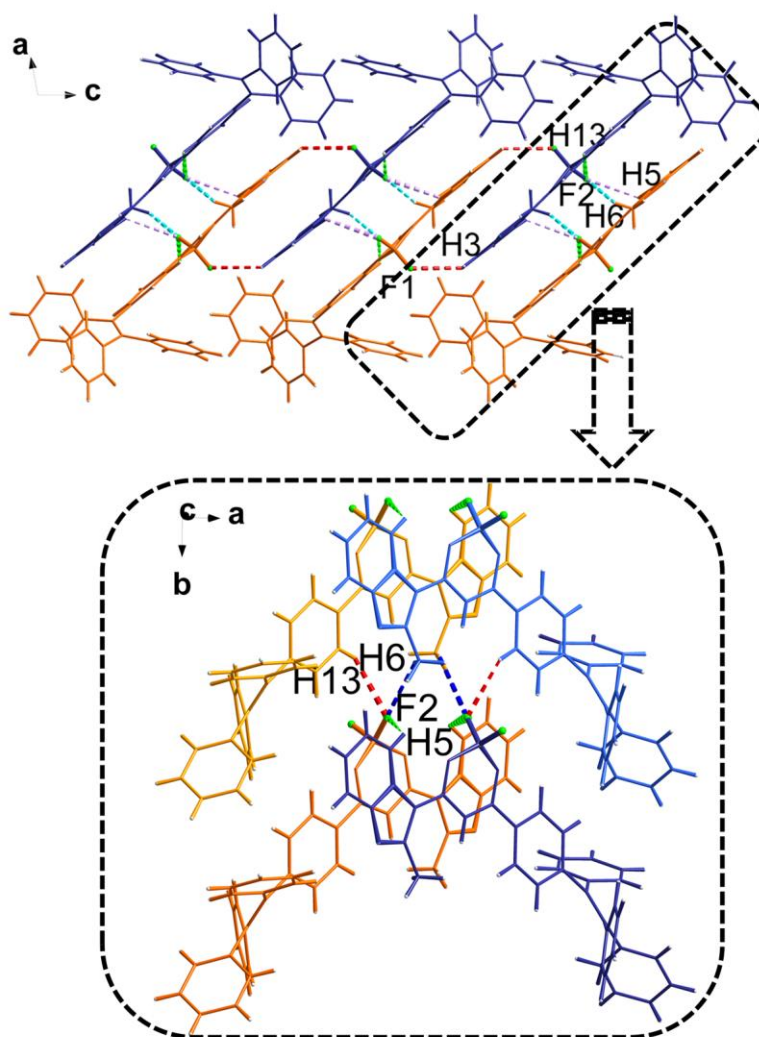

**Fig. S1** Crystal packing of **TPE-BF<sub>2</sub>acac-MeIP**. Hydrogen contacts are indicated by dashed lines.

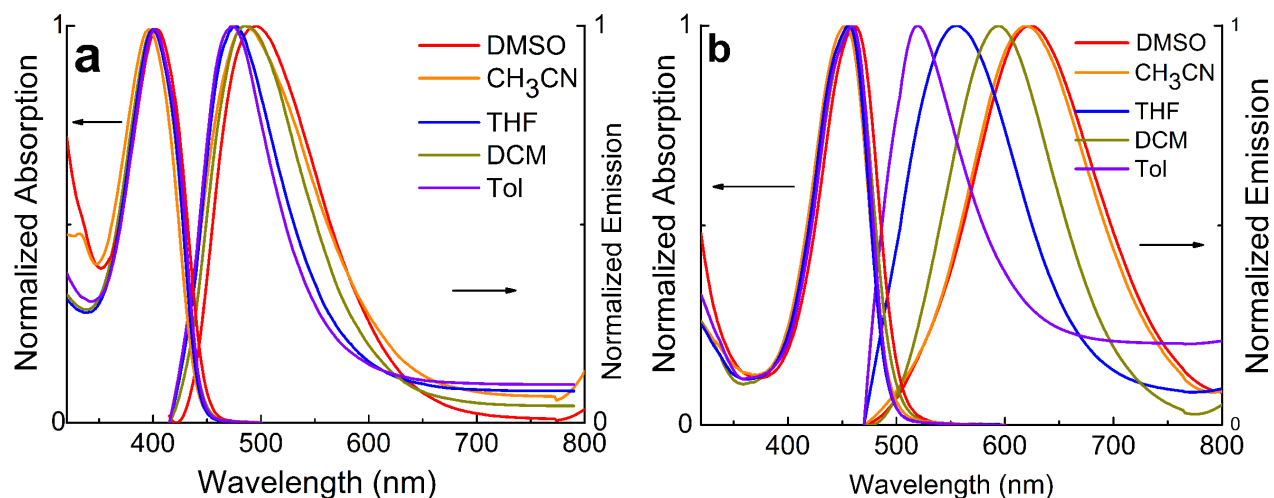

**Fig. S2** UV-vis absorption and emission spectra of **TPE-acac-MeIP** and **TPE-BF<sub>2</sub>acac-MeIP** in different solvents (20 μM).

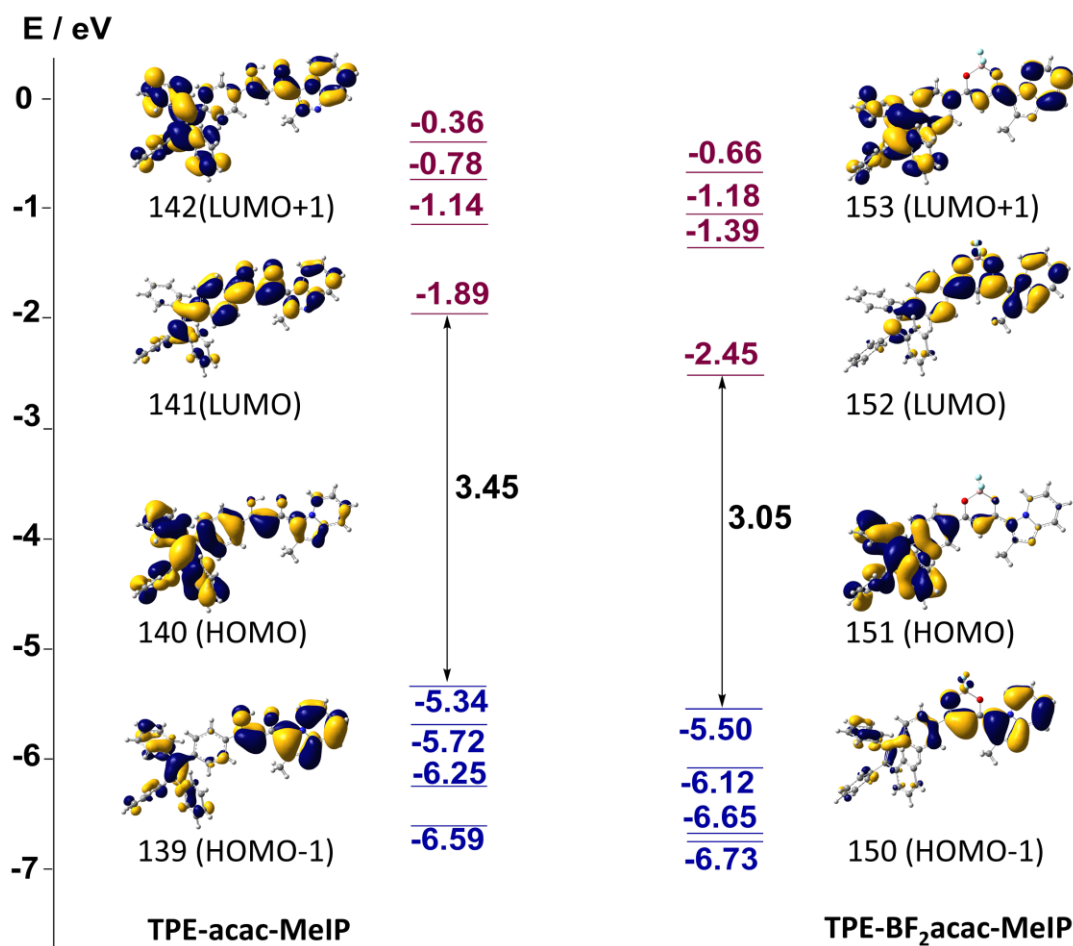

**Fig. S3** Energy level diagram of some frontier molecular orbitals, and orbital distributions for **TPE-acac-MeIP** and **TPE-BF<sub>2</sub>acac-MeIP**.

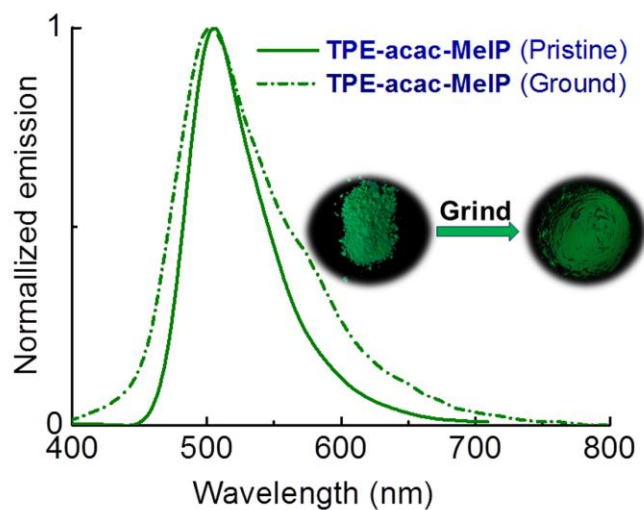

**Fig. S4** Emission spectra of **TPE-acac-MeIP** in different solid states ( $\lambda_{\text{ex}} = 360$  nm), and photos taken with UV-lamp irradiated at 365 nm.

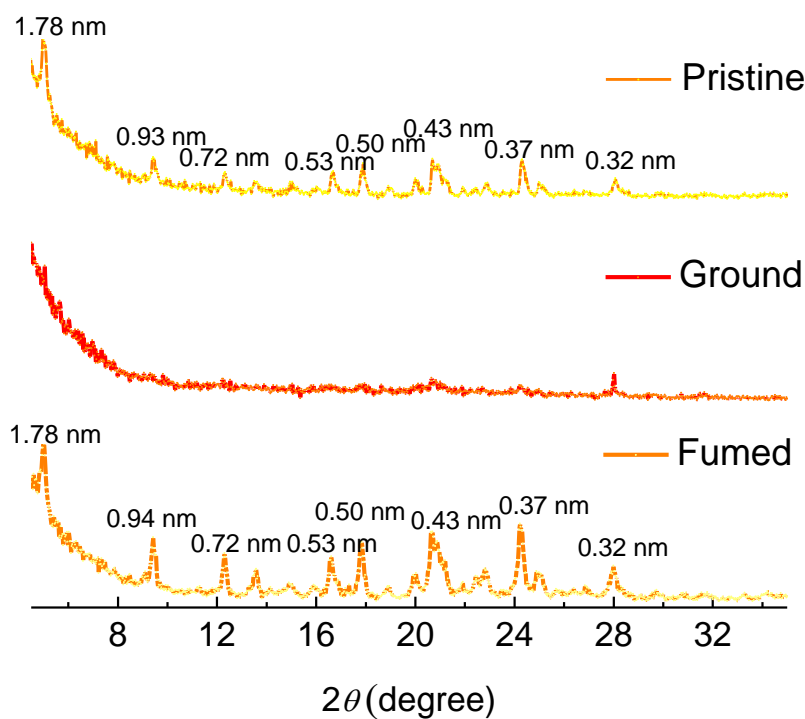

**Fig. S5** PXRD results of **TPE-BF<sub>2</sub>acac-MeIP**.

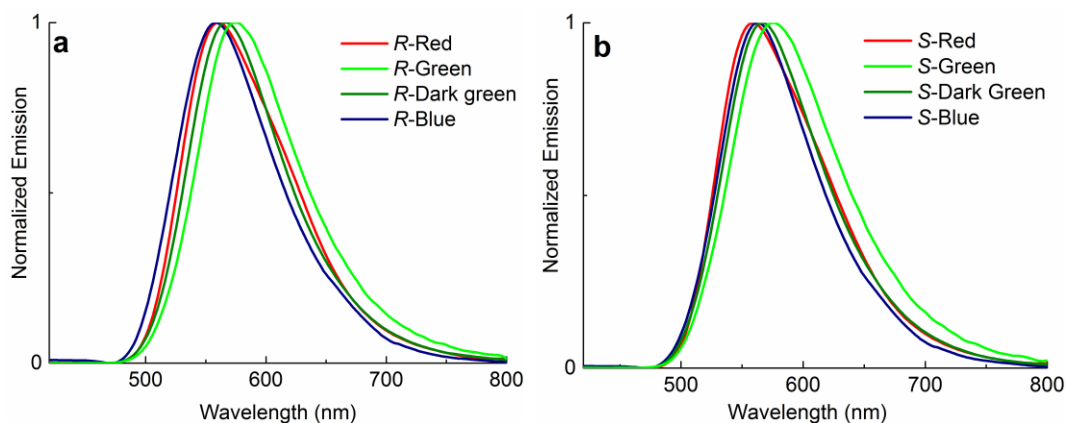

**Fig. S6** Emission spectra of (a) *R*-CLC films and (b) *S*-CLC films ( $\lambda_{\text{ex}} = 400$  nm).

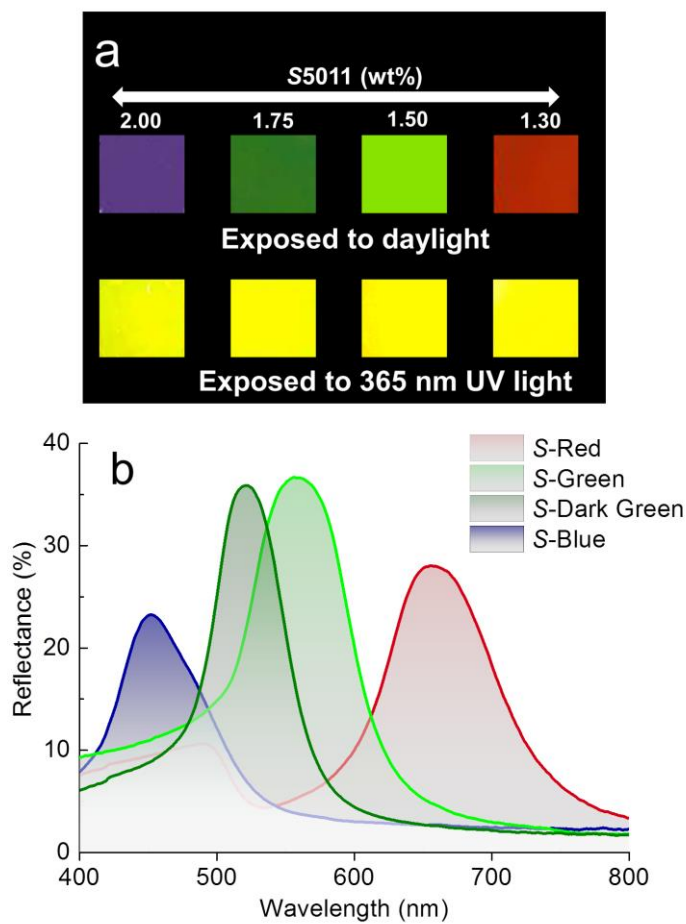

**Fig. S7** (a) Photographs and (b) DRUV-vis spectra of *S*-CLC films with different structural colors.

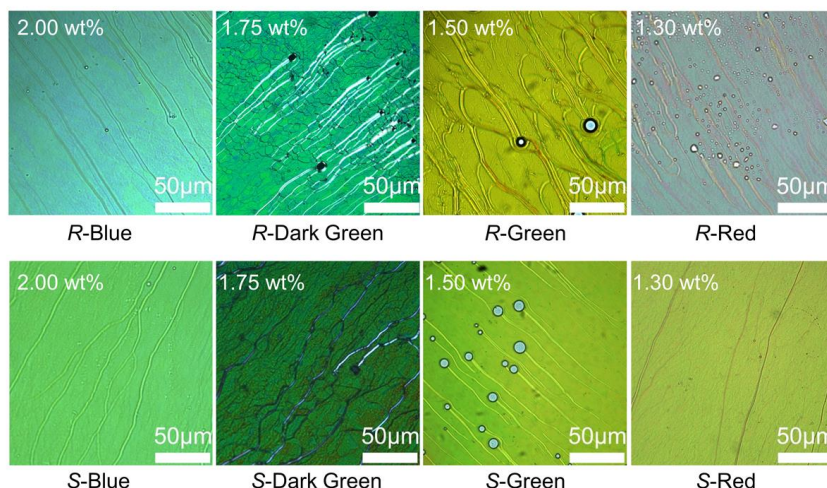

**Fig. S8** POM images of C6M with 2 wt% TPE-BF<sub>2</sub>acac-MeIP, and 2.00, 1.75, 1.50, and 1.30wt% R/S5011 at 90 °C.

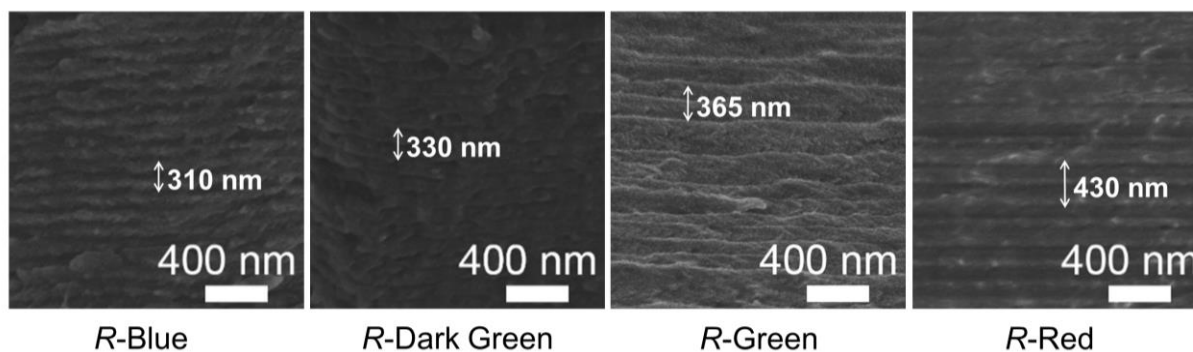

**Fig. S9** FESEM images the R-CLC films with 2.00, 1.75, 1.50, and 1.30 wt% R5011.

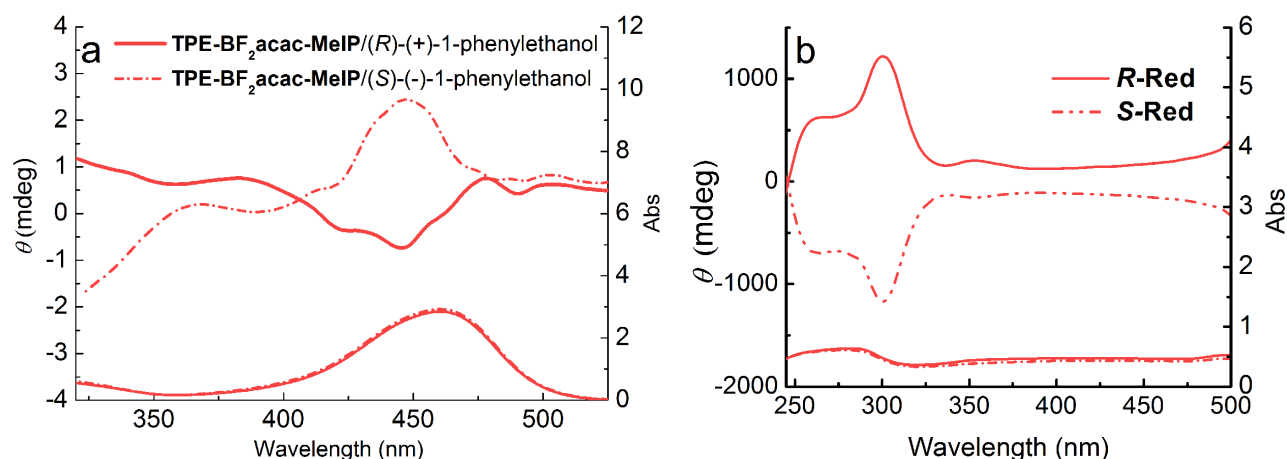

**Fig. S10** (a) CD and UV-vis spectra of TPE-BF<sub>2</sub>acac-MeIP in (R)-(+)-1-phenylethanol and (S)-(-)-1-phenylethanol ( $3 \times 10^{-4}$  M). (b) DRCD and UV-vis spectra of the R/S-Red PSCLC films in the range of 245 ~ 500 nm.

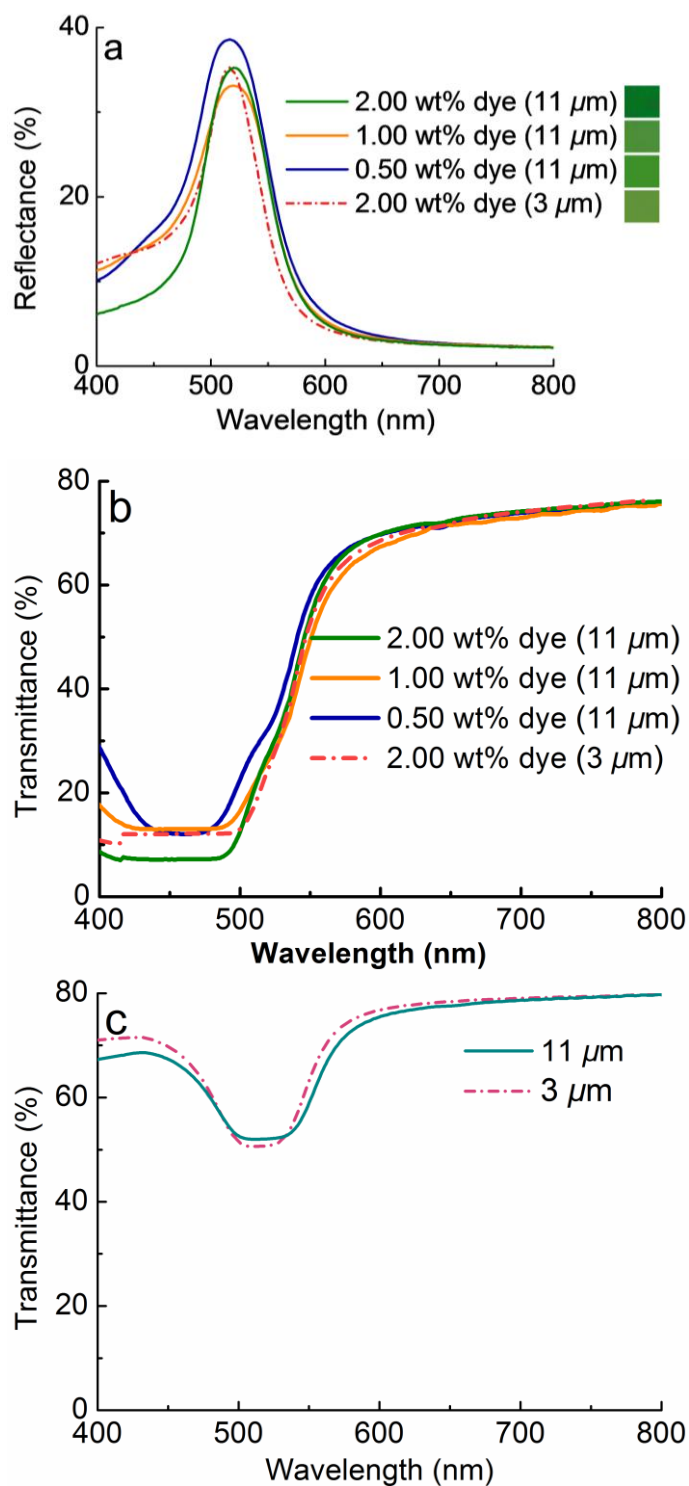

**Fig. S11** (a) DRUV-vis spectra and (b) transmittance spectra of with different dye concentrations and thicknesses of *R*-Dark Green PSCLC films. (c) Transmittance spectra of *R*-Dark Green PSCLC films (3 and 11  $\mu\text{m}$ -thickness) without dye.

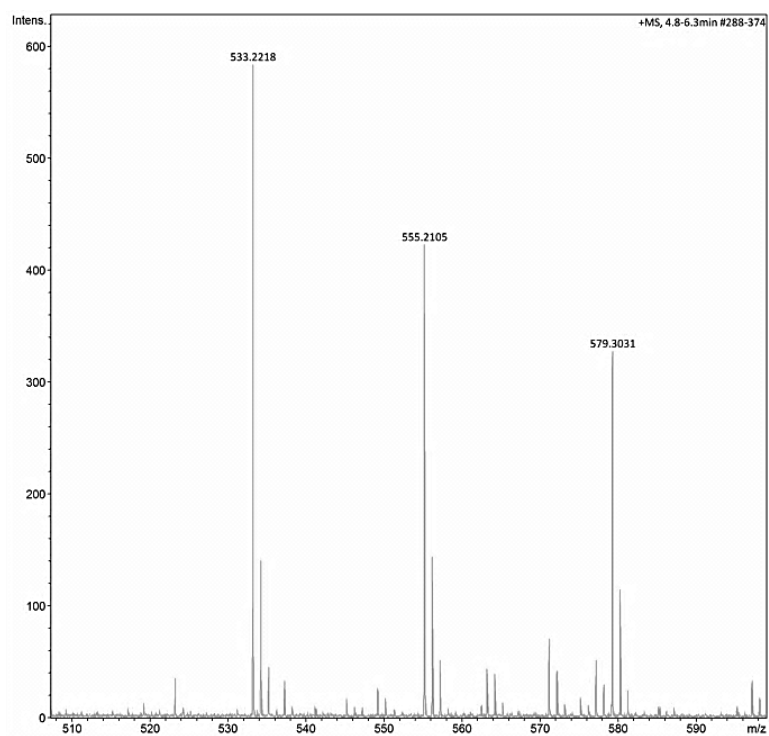

**Fig. S12** ESI-MS of TPE-acac-MeIP.

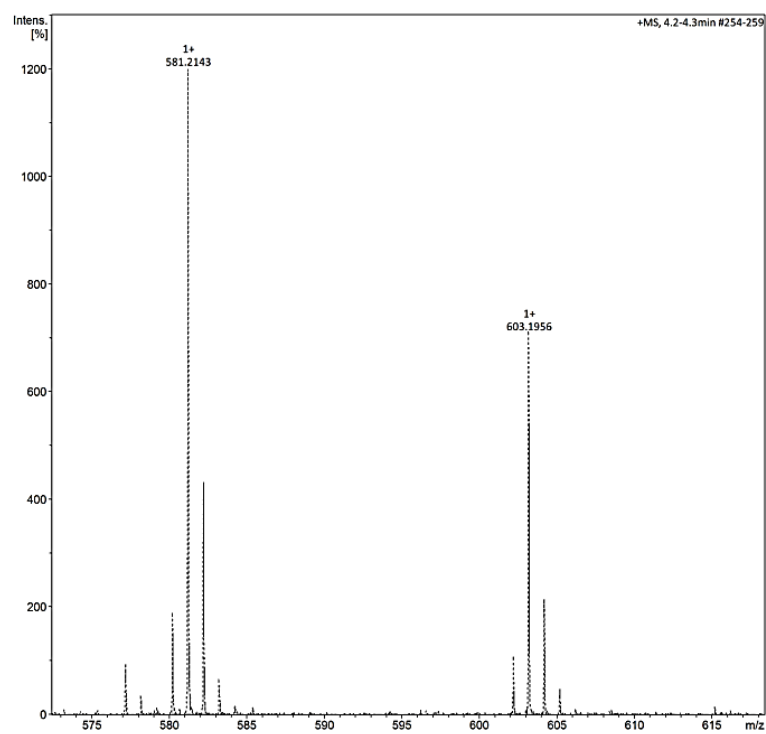

**Fig. S13** ESI-MS of TPE-BF<sub>2</sub>acac-MeIP.

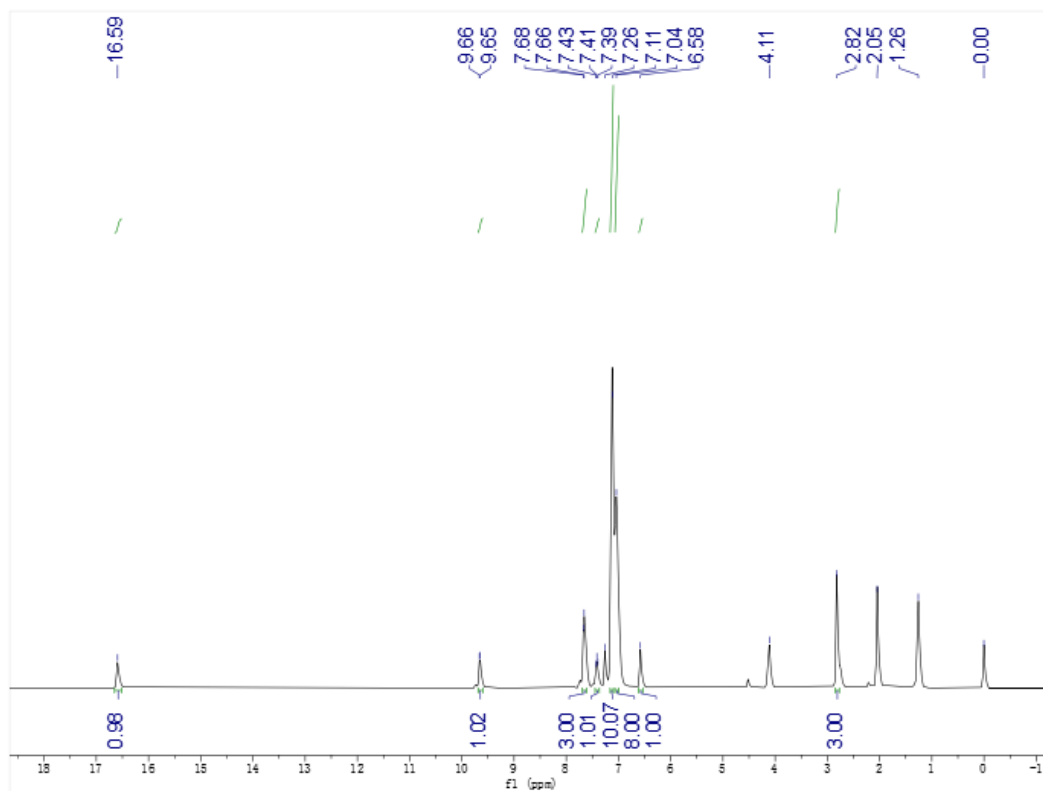

**Fig. S14**  $^1\text{H}$  NMR (400 MHz,  $\text{CDCl}_3$ ) spectrum of **TPE-acac-MeIP** [ $\delta$ : 4.11 ( $\text{CH}_2\text{CH}_3$  in EtOAc), 2.05 ( $\text{CH}_3\text{CO}$  in EtOAc), 1.26 ( $\text{CH}_2\text{CH}_3$  in EtOAc)].

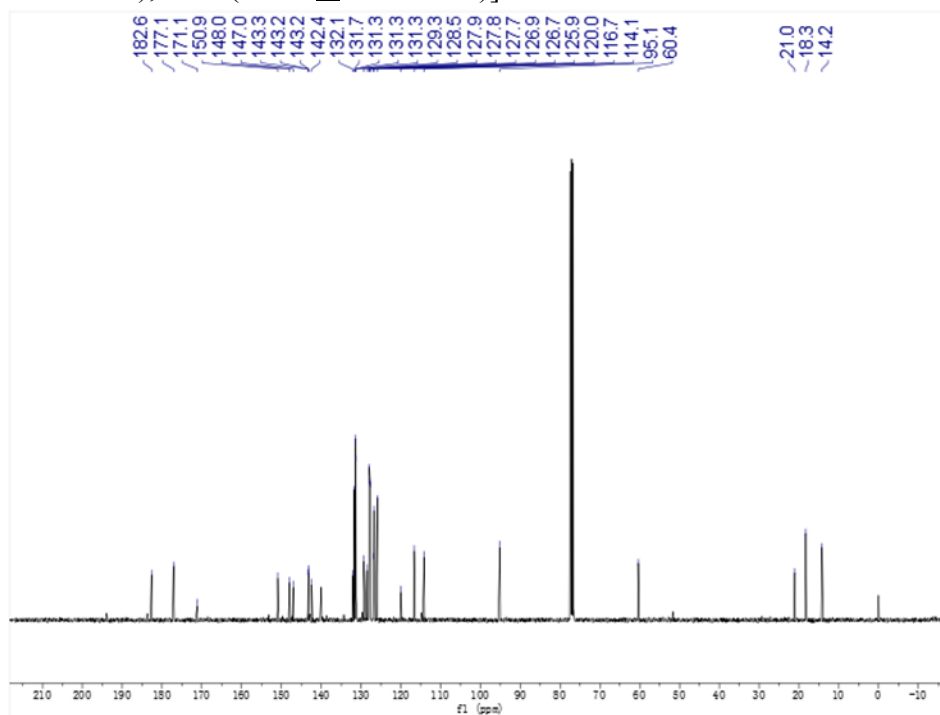

**Fig. S15**  $^{13}\text{C}$  NMR (100 MHz,  $\text{CDCl}_3$ ) spectrum of **TPE-acac-MeIP** [ $\delta$ : 171.1 ( $\text{CO}$  in EtOAc), 60.4 ( $\text{CH}_2$  in EtOAc), 21.0 ( $\text{CH}_3\text{CO}$  in EtOAc), 14.2 ( $\text{CH}_3$  in EtOAc)].

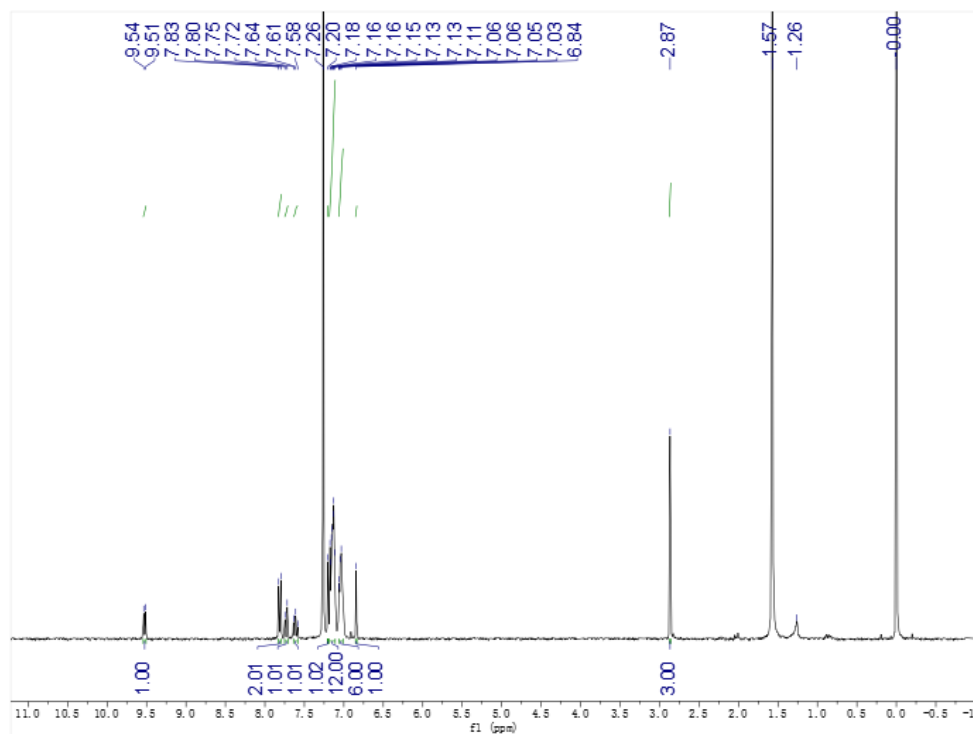

**Fig. S16**  $^1\text{H}$  NMR (400 MHz,  $\text{CDCl}_3$ ) spectrum of **TPE-BF<sub>2</sub>acac-MeIP** [ $\delta$ : 1.26 ( $\text{CH}_2\text{CH}_3$  in EtOAc), 1.57 ( $\text{H}_2\text{O}$ )].

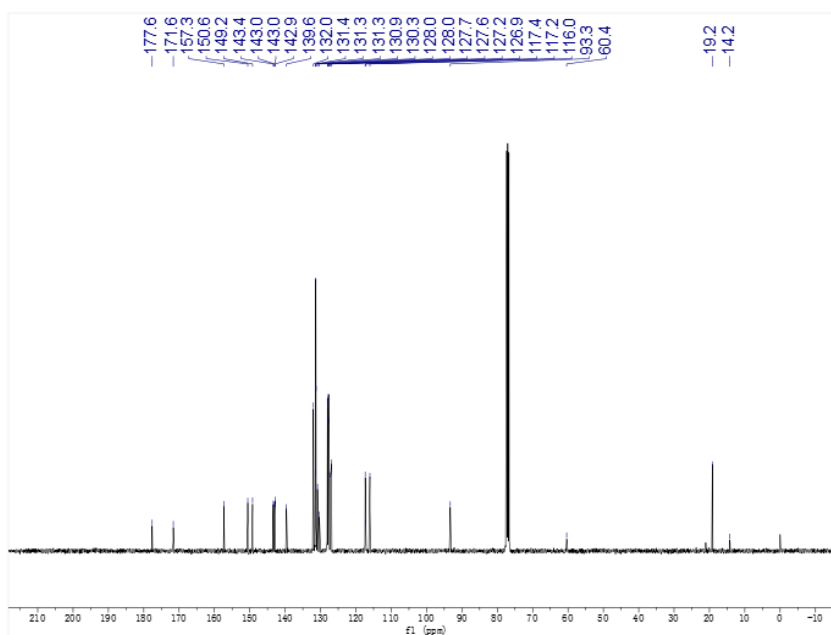

**Fig. S17**  $^{13}\text{C}$  NMR (101 MHz,  $\text{CDCl}_3$ ) spectrum of **TPE-BF<sub>2</sub>acac-MeIP** [ $\delta$ : 171.1 ( $\text{C=O}$  in EtOAc), 60.4 ( $\text{CH}_2$  in EtOAc), 21.0 ( $\text{CH}_3\text{CO}$  in EtOAc), 14.2 ( $\text{CH}_3$  in EtOAc)].

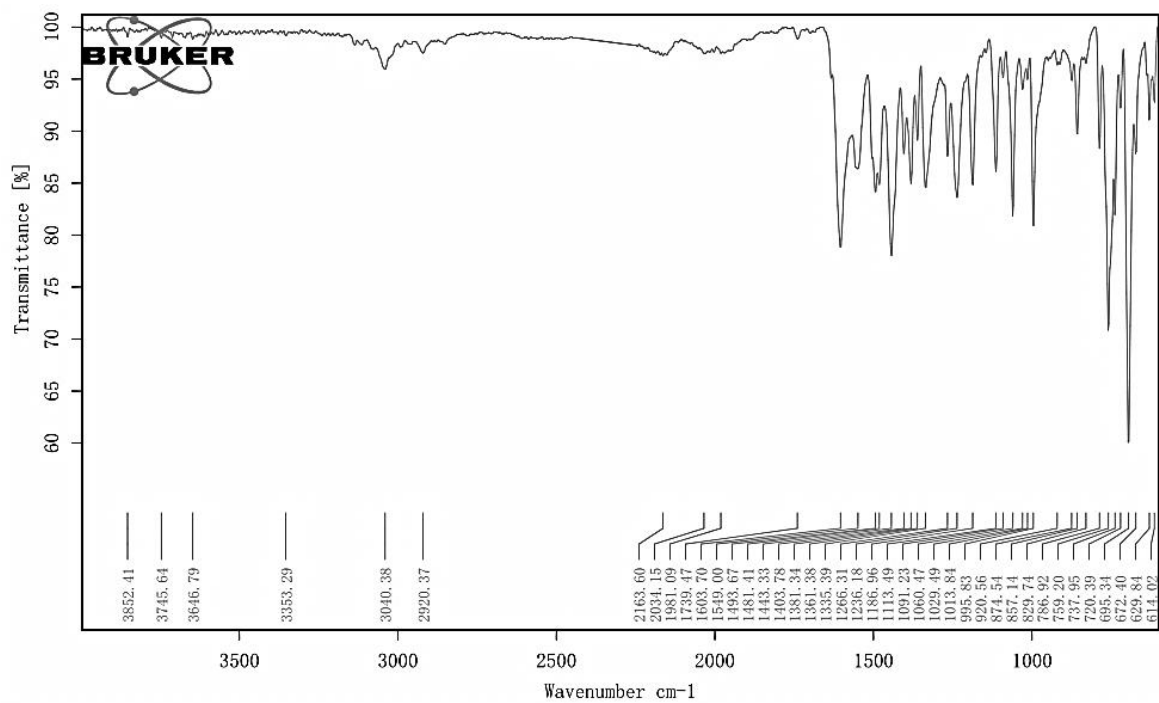

**Fig. S18** FT-IR of compound **TPE-acac-MeIP**.

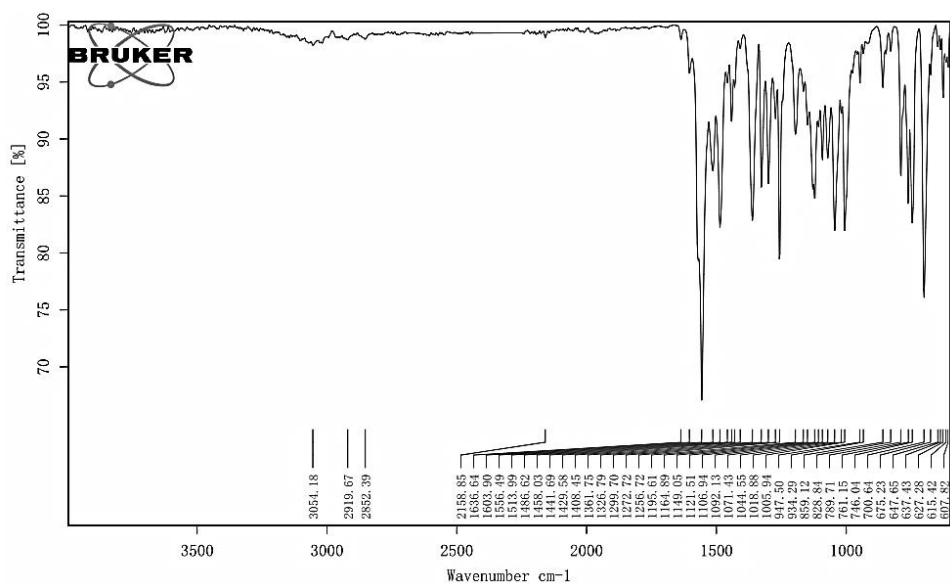

**Fig. S19** FT-IR of compound **TPE-BF<sub>2</sub>acac-MeIP**.
